# Supplementary material
Source: PubMed Central journal article supplement (PMC3971051)
Supplement: supp_130968_copd-stiell-3-at.pdf [file supp_130968_copd-stiell-3-at.pdf]

| <b>Appendix 3 (as supplied by authors): Sensitivity analysis: points assigned using model developed with multiple imputations</b> |             |                                      |               |
|-----------------------------------------------------------------------------------------------------------------------------------|-------------|--------------------------------------|---------------|
| <b>Variables</b>                                                                                                                  | <b>Beta</b> | <b>Beta<br/>After<br/>inflation*</b> | <b>Points</b> |
| Intercept                                                                                                                         | 0.78        | 1.42                                 |               |
| History of peripheral vascular disease                                                                                            | 0.83        | 1.53                                 | 1             |
| Prior coronary bypass graft                                                                                                       | 1.46        | 2.68                                 | 2             |
| Prior intubation for respiratory distress                                                                                         | 1.17        | 2.14                                 | 3             |
| ECG has acute ischemic changes                                                                                                    | 0.72        | 1.32                                 | 2             |
| Chest x-ray shows pulmonary congestion                                                                                            | 1.35        | 2.48                                 | 1             |
| Too ill to ambulate after emergency department treatment                                                                          | 1.00        | 1.83                                 | 2             |
| Heart rate on ED arrival $\geq$ 110                                                                                               | 1.52        | 2.79                                 | 2             |
| Hemoglobin < 100 g/L                                                                                                              | 0.77        | 1.41                                 | 3             |
| Urea $\geq$ 12 mmol/L                                                                                                             | 0.54        | 1.00                                 | 1             |
| Serum CO <sub>2</sub> $\geq$ 35 mmol/L                                                                                            |             |                                      | 1             |
| *Divided by the smallest coefficient 0.54.                                                                                        |             |                                      |               |

Appendix to: Stiell IG, Clement CM, Aaron SD, et al. Clinical characteristics associated with adverse events in patients with exacerbation of chronic obstructive pulmonary disease: a prospective cohort study. *CMAJ* 2014. DOI:10.1503/cmaj.130968. Copyright © 2014 Canadian Medical Association or its licensors
